1 **High-Throughput Translational Profiling with riboPLATE-seq**

2 Jordan B. Metz<sup>1,2,†</sup>, Nicholas J. Hornstein<sup>1,2,3,†</sup>, Sohani Das Sharma<sup>1,4</sup>, Jeremy Worley<sup>1</sup>, Peter A. Sims<sup>1,5,\*</sup>

3

4 1. Department of Systems Biology, Columbia University Irving Medical Center, New York, NY 10032, USA

5 2. Medical Scientist Training Program, Columbia University Irving Medical Center, New York, NY 10032, USA

6 3. Department of Medicine, University of California, Los Angeles, Los Angeles, CA 90095, USA

7 4. Department of Biological Sciences, Columbia University, New York, NY 10027, USA

8 5. Department of Biochemistry & Molecular Biophysics, Columbia University Irving Medical Center, New York, NY

9 10032, USA

10 † Co-first authors

11 \* Corresponding author

12

13 **Contact Information:**

14 Jordan Metz – [jm3423@cumc.columbia.edu](mailto:jm3423@cumc.columbia.edu)

15 Nicholas Hornstein – [njh219@gmail.com](mailto:njh219@gmail.com)

16 Sohani Das Sharma – [sohani.dassharma@gmail.com](mailto:sohani.dassharma@gmail.com)

17 Jeremy Worley – [jw3409@cumc.columbia.edu](mailto:jw3409@cumc.columbia.edu)

18 Peter Sims – [pas2182@cumc.columbia.edu](mailto:pas2182@cumc.columbia.edu)

19

20

21

22

23

24

25 **ABSTRACT**

26 Protein synthesis is dysregulated in many diseases, but we lack a systems-level picture of how signaling  
27 molecules and RNA binding proteins interact with the translational machinery, largely due to  
28 technological limitations. Here we present riboPLATE-seq, a scalable method for generating paired  
29 libraries of ribosome-associated and total mRNA. As an extension of the PLATE-seq protocol, riboPLATE-  
30 seq utilizes barcoded primers for pooled library preparation, but additionally leverages rRNA  
31 immunoprecipitation on whole polysomes to measure ribosome association (RA). We demonstrate the  
32 performance of riboPLATE-seq and its utility in detecting translational alterations induced by inhibition  
33 of protein kinases.

34

35 **KEYWORDS**

36 RNA-seq, translation, ribosome, immunoprecipitation, mTOR, MNK

37

38 **BACKGROUND**

39 The cellular responses to many physiologic stimuli require new programs of protein production.  
40 Transcriptional regulation allows direct control of gene expression over a broad dynamic range, but cells  
41 can often more rapidly adjust protein expression levels through translational control. Consequently,  
42 alongside transcription factors and their associated regulatory networks, there are mechanisms of  
43 modulating the translation of specific genes. mTOR is an important example of a translational regulator  
44 that integrates many potential extracellular signals to regulate cellular metabolism and protein  
45 synthesis. Activated through the PI3K/Akt/mTOR signaling axis, mTORC1 phosphorylates eIF4E inhibitors  
46 (4E-binding proteins, or 4E-BPs), which releases eIF4E and promotes formation of the eIF4F complex in

47 the initial steps of translational initiation<sup>1</sup>. The actions of mTORC1 are mediated in a sequence-specific  
48 manner by 5' terminal oligopyrimidine (5'TOP) motifs, which are C/T-rich sequences in the 5' UTRs of  
49 mTORC1 target transcripts<sup>2</sup>. The mTOR protein, the 4E-BP/eIF4E axis, and the 5'TOP tract-containing  
50 genes (TOP genes) constitute a basic translational regulatory network.

51 Despite the attention garnered by profiling and modeling transcription control networks, less progress  
52 has been made in understanding systems-level translational control. This is in part due to technological  
53 limitations of current translational profiling protocols, which lack the scalability for coupling  
54 measurements of protein synthesis with a large number of perturbations. Early genome-wide studies of  
55 translational regulation combined polysome profiling and microarray analysis to quantify ribosome  
56 association on a gene-by-gene basis<sup>3</sup>. The combination of nuclease footprinting of ribosomes<sup>4</sup> and deep  
57 sequencing led to the development of ribosome profiling, which refines translational profiling by  
58 resolving the positions of bound ribosomes throughout the transcriptome with single-nucleotide  
59 resolution<sup>5</sup>. More recent modifications expand on this concept, such as cell type specificity through  
60 recombinant tagging of ribosomes driven by cell type-specific markers (e.g. RiboTag)<sup>6,7</sup>, increased  
61 sensitivity via ligation-free ribosome profiling<sup>8</sup>, or targeted profiling in specific sub-cellular  
62 compartments<sup>9</sup>. Although these approaches are amenable to detailed mechanistic analysis of  
63 translational control in a small number of samples, they are prohibitively expensive and labor-intensive  
64 to scale for concurrent analyses of multiple perturbations across a larger sample set. The ideal  
65 technology for systems-level analysis would couple genome-wide perturbations to a genome-wide  
66 readout of translation, allowing direct observation of translational alterations in specific genes in  
67 response to a systematic screen of potential perturbations.

68 Here we present riboPLATE-seq, a scalable method for generating paired libraries of ribosome-  
69 associated and total RNA, which is based on our recently reported Pooled Library Amplification for  
70 Transcriptome Expression (PLATE-seq) technology<sup>10</sup>. PLATE-seq allows highly-multiplexed RNA-seq, by

71 introducing sample-specific barcodes during reverse transcription to enable pooling of cDNA from  
72 multiple individual samples at an early stage of library preparation, reducing both reagent and labor  
73 costs. Furthermore, as PLATE-seq generates cDNA fragments strictly from the 3' ends of intact,  
74 polyadenylated RNA via oligo-dT pulldown and priming, the resulting libraries saturate more rapidly  
75 than those with full gene body coverage. Consequently, PLATE-seq is advantageous over conventional  
76 RNA-seq in throughput of both library preparation and sequencing.

77 We take advantage of riboPLATE-seq for parallel, genome-wide translational profiling in 96 samples,  
78 which would be technically challenging with conventional polysome or ribosome profiling. riboPLATE-  
79 seq uses pan-ribosomal immunoprecipitation to isolate the ribosome-associated fraction of each species  
80 of polyadenylated transcript, enabling inferences regarding gene-specific translation akin to polysome  
81 profiling. Using PLATE-seq as a readout for ribosomal IP, riboPLATE-seq enables high-throughput  
82 translational profiling and screening of potential translational regulators. While riboPLATE-seq measures  
83 the abundance of ribosome-bound mRNA rather than nucleotide-resolved ribosome density (as in  
84 ribosome profiling), it is highly scalable, inexpensive, and seamlessly compatible with automated liquid  
85 handling.

86 In this study, we use riboPLATE-seq to interrogate translational regulation mediated by the  
87 PI3K/Akt/mTOR and MAPK/ERK signaling pathways. By treating cells with inhibitory drugs targeting  
88 mTOR, PI3K, and MNK1 in a multi-well plate, we sought to uncover specific per-gene signatures of  
89 altered translation corresponding to loss of function in these kinases. Additionally, we tested pairwise  
90 combinations of these inhibitors to characterize their potential interactions. We also generated  
91 signatures of mTOR and MNK1 inhibition in ribosome profiling and RNA sequencing for comparison to  
92 established methods of interrogating translation. Importantly, ribosome profiling provides a measure of  
93 ribosome-mRNA association that is quantitatively distinct from that of riboPLATE-seq. The ratio of  
94 aligned reads in ribosome profiling over aligned reads in RNA-seq libraries obtained from the same

95 biological sample corresponds to the average number of ribosomes bound per individual transcript. In  
96 contrast, the ratio of aligned reads in riboPLATE-seq over normal PLATE-seq corresponds instead to the  
97 fraction of the total transcribed pool of transcripts bound by ribosomes.

98

## 99 **RESULTS**

### 100 **riboPLATE-seq Technology**

101 riboPLATE-seq enables transcriptome-wide measurements of ribosome association in a multi-well plate  
102 format by combining pan-ribosomal immunoprecipitation (IP) with a low-cost technique for RNA-seq  
103 called PLATE-seq (Figure 1A). In PLATE-seq, we isolate polyadenylated RNA species with an oligo-d(T)  
104 capture plate, followed by incorporation of a well-specific barcode in poly(T)-primed reverse  
105 transcription. After mixing the barcoded cDNA libraries from each well of a plate, we conduct all  
106 subsequent library preparation steps on a single, pooled sample and sequence the resulting libraries to a  
107 modest depth (~4 million reads per well). Previous studies have used ribosome IP to isolate ribosome-  
108 bound mRNA from specific cell types *in vivo* with the translating ribosome affinity purification (TRAP)<sup>11</sup>  
109 and RiboTag<sup>6</sup> systems, relying on transgenic or recombination-driven epitope labeling of ribosomal  
110 proteins. In riboPLATE-seq, we use a native epitope in the 5.8S rRNA for pan-ribosomal IP. By comparing  
111 transcript abundance as measured by PLATE-seq both with and without ribosomal IP, we can measure  
112 gene-specific ribosome association across the transcriptome. In this way, riboPLATE-seq can extend the  
113 scalability of PLATE-seq from transcriptional to translational profiling.

114 To implement riboPLATE-seq, we divide polysome lysates from a multi-well plate experiment into two  
115 plates. We then subject one plate to indirect, pan-ribosomal IP on an automated liquid handling system  
116 with biotinylated anti-rRNA antibody y10b and streptavidin-coated magnetic beads. Finally, we generate  
117 PLATE-seq libraries from the immunoprecipitated polysomes from the first plate and total lysate from

118 the second plate as described previously. This design minimizes sample-to-sample noise due to batch  
119 effects by processing an entire plate as one batch, and simultaneous processing of a plate via automated  
120 liquid handling systems significantly reduces the time and effort required for processing large numbers  
121 of samples. Furthermore, per-sample reagent costs are substantially lower in PLATE-based library  
122 preparations. PLATE-seq generates 3'-end RNA libraries for under \$6 per sample in reagents, while  
123 riboPLATE-seq requires additional expenses for automated ribosome IP totaling ~\$7 per sample for  
124 reagents and disposables, all in 96-well plate format. A full riboPLATE-seq study performed on one 96-  
125 well plate costs less than \$20 in materials per sample to generate paired libraries of ribosome-  
126 associated and total RNA, compared with \$86 for ligation-free ribosome profiling and RNA sequencing.

### 127 **riboPLATE-seq Translational Profiling Screen**

128 To characterize the performance of riboPLATE-seq, we designed an experiment to identify the  
129 translational impact of inhibiting multiple components of mitogenic signaling in cancer cells. TS-543  
130 glioma neurospheres harbor an activating mutation in PDGFRA, leading to increased mitogenic signaling  
131 activity<sup>12</sup> that exacerbates the effects of inhibiting these pathways. We treated cells seeded in a 96-well  
132 plate with inhibitors of the PI3K/Akt/mTOR and MAPK/ERK signaling axes for six hours (Figure 1B), as  
133 both pathways converge on the ribosome at eIF4E and are thought to influence the formation of the  
134 eIF4F complex. This complex, formed from the cap-binding protein eIF4E, the RNA helicase eIF4A, and  
135 the scaffold protein eIF4G, is required for cap-dependent translation initiation, and the association of  
136 eIF4E and eIF4G is a heavily regulated component of this process. PI3K activates AKT which  
137 phosphorylates mTOR, and activated mTOR facilitates eIF4F formation by phosphorylation of eIF4E-  
138 interacting proteins (4E-BPs), which then release eIF4E<sup>1,2</sup>. Separately, the MAPK signaling cascade  
139 activates MNK1, which phosphorylates eIF4E directly, increasing its affinity for the 5' m7G cap and  
140 stabilizing eIF4F<sup>13</sup>. By screening several members of these two pathways we sought to identify targets  
141 specific to each individual member and compare translational signatures between pathways. The drug

142 treatments in total consisted of two competitive mTOR inhibitors, PP242 and AZD-8055; an inhibitor of  
143 PI3K upstream of mTOR, BKM120; a specific inhibitor of MNK1/2 activity, MNK-i1; and 4EGI-1, a 4E-BP  
144 mimic that inhibits the association of eIF4E and eIF4G. We determined concentrations of these drugs  
145 from an examination of the literature, ensuring values near the half-maximum inhibitory concentrations  
146 (IC50) for the main substrates of the drugs in question: 625nM PP242<sup>14</sup>, 50nM AZD-8055<sup>15</sup>, 1 $\mu$ M  
147 BKM120<sup>16</sup>, 100nM MNK-i1<sup>17</sup>, and 50 $\mu$ M 4EGI-1<sup>18</sup>. In order to analyze possible interactions between  
148 kinases, we also treated samples with pairwise combinations of PP242, BKM120, and MNK-i1.

149 Previous studies of the effect of MAP kinase interacting kinases (MKNKs, a.k.a. MNKs 1/2) on  
150 translational regulation utilized small-molecule inhibitors of these proteins, notably the compound  
151 CGP57380<sup>19,20</sup>. However, this compound has been shown to be a nonspecific inhibitor of several  
152 unrelated kinases, with effects on eIF4F formation independent of its effects on MNKs. CGP57380 has  
153 low-micromolar IC50 values for MNK isoforms (0.87  $\mu$ M/ 1.6 $\mu$ M for MNK1/MNK2, respectively) and  
154 significantly inhibits other kinases at these concentrations, including MKK1, CK1, and BRSK2<sup>21</sup>.

155 Additionally, CGP57380 concentrations below that which affects eIF4E phosphorylation may still  
156 decrease proliferation and survival, and an increase in eIF4E:4EBP binding occurs at concentrations  
157 below those impacting MNK1, indicating broad off-target effects impinging translational regulation<sup>22</sup>.

158 Determination of the translational targets of MNK1 via ribosome or polysome profiling with this drug in  
159 prior work is complicated by this lack of specificity, especially with regards to off-target effects directly  
160 impacting translational machinery. In contrast, MNK-i1 has been recently identified as a highly specific  
161 MNK inhibitor, with IC50 values of 0.023  $\mu$ M and 0.016  $\mu$ M for MNK1 and MNK2 respectively, and blocks  
162 eIF4E phosphorylation without impacting other pathways converging on eIF4E<sup>22</sup>. We therefore sought to  
163 clarify the effect of MNK1 on translation with this novel inhibitor.

164 For comparison, we performed ribosome profiling and RNA-seq on TS-543 neurospheres treated with  
165 PP242 or MNK-i1 in identical regimens to the riboPLATE-seq study, in order to assess the similarity of  
166 translational perturbations detected across experiment types. As riboPLATE-seq measures the fraction  
167 of an expressed transcript associated with ribosomes (hereafter referred to as “ribosome association” or  
168 RA) and ribosome profiling/RNA-seq measure the average number of ribosomes bound per transcript  
169 (conventionally defined as “translation efficiency” or TE), we expected these two methods to give  
170 quantitatively distinct results while identifying similar sets of targets for these translational regulators.

### 171 **Performance of riboPLATE-seq**

172 First, we assessed the quality of the pooled ribosome-associated riboPLATE-seq and normal PLATE-seq  
173 libraries in terms of library complexity and saturation. Figures 2A and 2B show saturation curves for  
174 riboPLATE-seq and PLATE-seq, respectively, demonstrating the dependence of these libraries’  
175 sensitivities on read depth. The two curves are comparable, with ~10-11K unique genes detected at  
176 saturating depth, though riboPLATE-seq requires about twice the number of aligned reads as PLATE-seq  
177 to achieve this saturation. As expected, PLATE-seq libraries contain more unique genes on average than  
178 riboPLATE-seq libraries despite a shallower sequencing depth. Asymmetric division of initial lysate  
179 volumes favoring ribosome IP over unmodified PLATE-seq (90%/10%) helped to combat this inherent  
180 inequality, generating sufficiently complex libraries in both cases.

181 Figure 2C highlights the differences between riboPLATE-seq and PLATE-seq in terms of library  
182 complexity and sequencing depth, and compares these with libraries generated by ligation-free  
183 ribosome profiling and conventional RNA-seq. On average, riboPLATE-seq detects approximately 9,800  
184 unique genes in 1.4 million uniquely mapped reads, while PLATE-seq detects an average of 10,400 genes  
185 in 0.6 million reads per sample in this study. These measurements are comparable to the initial report  
186 characterizing PLATE-seq, in which Bush et al. detected an average of approximately 10,200 genes from



187 0.67 million uniquely mapped reads per sample<sup>10</sup>. In contrast, ligation-free ribosome profiling and total  
188 RNA sequencing libraries downsampled to the respective median read depths of riboPLATE-seq and  
189 PLATE-seq libraries still detect ~14,000 genes each, reflecting the inherent complexity of these libraries  
190 even at reduced sequencing depths (Additional File #1: Supplementary Figure S1). At full depth,  
191 ribosome profiling libraries detect an average of 14,000 genes per 2 million reads, while RNA-seq  
192 detects 15,000 genes in 1.6 million reads per sample. In summary, both riboPLATE-seq and PLATE-seq  
193 generate libraries of a lower overall complexity than ribosome profiling and RNA sequencing, and  
194 require substantially fewer reads to achieve saturation.

195 To determine the specificity of pan-ribosomal IP for ribosome-bound RNA, we measured the depletion  
196 of RNA species for which we expected little or no ribosome association (RA) in the riboPLATE-seq vs  
197 PLATE-seq libraries. We measured depletion extrinsically, with respect to a set of polyadenylated spike-  
198 in RNAs added after lysis, and intrinsically with respect to the set of highly-expressed, polyadenylated  
199 non-coding RNA transcripts (ncRNA) contained in the UCSC “known genes” RefSeq annotation. Figures  
200 2D-E summarize these two analyses.

201 To assess the depletion of spike-in RNA in riboPLATE-seq, we added polyadenylated RNA standards  
202 (ERCC spike-ins) to half of the wells in a riboPLATE-seq experiment, after lysis but prior to ribosome IP.  
203 Figure 2D shows the distribution of the log<sub>2</sub>-ratio of spike-in abundance in riboPLATE-seq to PLATE-seq,  
204 demonstrating depletion of spike-ins associated with ribosomal IP across most wells. The wells exhibit a  
205 median 4.5-fold depletion ratio, and 31/48 wells exhibit 4-fold depletion or greater. However, two wells  
206 exhibit a modest (<2-fold) enrichment of spike-ins after ribosome IP, and the wide distribution of  
207 depletion log<sub>2</sub>-ratios ranges from 11 to 0.7 (equivalent to ~1.6-fold relative enrichment). Aside from  
208 potential non-specific pulldown of spike-ins, random re-initiation of free ribosomes on polyadenylated  
209 transcripts in lysate could result in their capture by ribosome immunoprecipitation, resulting in their

210 enrichment in riboPLATE-seq. This might be minimized in future riboPLATE-seq studies by inclusion of  
211 GDPNP in the lysis buffer. As GTP hydrolysis is required in both start site selection and subunit joining  
212 steps of 80S initiation complex formation, inclusion of a non-hydrolyzable GTP analogue such as GDPNP  
213 would prevent re-initiation of free ribosomes in lysate<sup>23</sup>. In summary, inclusion of ERCC RNA spike-ins  
214 provides a valuable, internal quality control measurement to check IP fidelity in riboPLATE-seq.

215 As ribosome profiling has revealed low but significant levels of ribosome occupancy among ncRNA<sup>24</sup>, we  
216 sought to contrast ribosome association between ncRNA and mRNA transcripts with riboPLATE-seq. We  
217 expected noncoding transcripts to be generally depleted in our riboPLATE-seq libraries compared with  
218 PLATE-seq libraries from the same samples. Indeed, we observed lower RA for the set of highly-  
219 expressed ncRNA transcripts than mRNA within the same sample (Figure 2E). Examining the relationship  
220 between RA and transcript abundance across ncRNA and mRNA gene sets also uncovered lower RAs for  
221 ncRNA than mRNA at all expression levels (Figure 2F), with similar patterns observed between  
222 translation efficiency (TE) and expression level in our ribosome profiling and RNA-seq data (Figure 2G).  
223 Combined with the observed spike-in depletion, our results are consistent with the depletion of RNA  
224 that is not bound to ribosomes by the pan-ribosomal immunoprecipitation implemented in riboPLATE-  
225 seq.

### 226 **Pharmacological Screening of Mitogenic Signaling with riboPLATE-seq**

227 After establishing the performance of the riboPLATE-seq, we sought to characterize its ability to detect  
228 differential expression and RA. In principal component analyses (PCA) of the PLATE-seq and riboPLATE-  
229 seq profiles, samples segregate according to the drug with which they were treated and related drugs  
230 co-cluster (Figure 3A, B). Principal component 1 (PC1) separates DMSO-treated controls from drug-  
231 treated samples, and PC2 separates samples treated with one kinase inhibitor from those treated with

232 4EGI1 or a combination of kinase inhibitors. Combination-treated samples co-cluster more readily with  
233 each other than with any of their singularly-treated counterparts due to separation on PC2.

234 We further calculated RA for all genes in all samples using riboPLATE- and PLATE-seq counts and  
235 differences in RA across the genome relative to DMSO-treated controls. PCA plots of RA and log-fold  
236 change in RA are shown in Figures 3C and 3D, respectively. In both, PC2 separates combination- and  
237 4EGI1-treated samples from singularly-treated samples (PP242, BKM120, MNK-i1, or AZD8055 alone), as  
238 it does in the previous plots in Figure 3A and 3B, while PC1 separates drugs by the number of genes  
239 displaying significant perturbations in RA compared with controls. In all plots, clusters of samples  
240 treated with singular drugs are organized in a manner consistent with their expected effects. Clusters  
241 corresponding to the three inhibitors of the mTOR signaling axis (PP242, BKM120, and AZD8055) nearly  
242 overlap in Fig. 3A and are very closely spaced in Fig. 3B, while MNK-i1-treated samples cluster more  
243 closely to the DMSO-treated controls, suggestive of weaker effects.

244 This division between strong and weak inhibitors also appears in the RA-dependent plots in Figure 3C  
245 and 3D. In both, MNK-i1-treated samples have more negative PC1 values than any of those treated with  
246 mTOR axis inhibitors, while PP242-treated samples have the most positive PC1 values of any single  
247 kinase inhibitor. For  $PC2 > 0$ , the clusters corresponding to different singular kinase inhibitors are  
248 arranged in order of the number of significant RA perturbations they exhibit in comparison to DMSO  
249 controls (MNK-i1, AZD-8055, BKM120, then PP242; Spearman rank correlation  $p=0.0$ ). Below the  $PC2=0$   
250 line, clusters which correspond to combination and 4EGI-1 treatments are similarly arranged along PC1  
251 (4EGI-1, MNK-i1/BKM120, PP242/MNK-i1, PP242/BKM120; Spearman rank correlation  $p=0.0$ ) (Table 2).

## 252 **riboPLATE-seq Differential Translation Efficiency Analysis**

253 In order to more rigorously analyze differential ribosome association as a function of drug treatment, we  
254 utilized DESeq2 to compare the replicates for each drug treatment to vehicle controls. We first identified

255 the total set of significantly differentially ribosome-associated genes across all singular drug treatments  
256 and generated a hierarchically-clustered heatmap of differential RA across conditions (Figure 4A).  
257 Signatures of differential RA due to treatment with PP242 (mTOR inhibitor), AZD8055 (mTOR inhibitor),  
258 and BKM120 (PI3K inhibitor), which target the PI3K/mTOR pathway, form a cluster in the column  
259 dendrogram. As expected, MNK-i1 and 4EGI-1 targets cluster separately. MNK-i1 targets MNK1 in a  
260 separate pathway converging on the ribosome at eIF4E, and 4EGI-1 is a broad inhibitor of eIF4E and cap-  
261 dependent translation in general.

262 The closely related differential-RA signatures for PP242, BKM120, and AZD8055 also include strong  
263 downregulation of the 5'TOP motif-containing genes, canonical translational targets of mTOR signaling,  
264 as indicated by the black tick marks in Figure 4A. In the rightmost two columns of Figure 4A, signatures  
265 of differential translation efficiency obtained via ribosome profiling and RNA-seq recapitulate the major  
266 patterns seen in differential RA. Both up- and down-regulated targets of PP242 are in good agreement  
267 between the two methods. The 5'TOP motif-containing genes exhibit low TE by ribosome profiling after  
268 PP242 treatment, whereas MNKi-1 treatment is far less effective on these genes based on ribosome  
269 profiling and leads to fewer differentially translated genes in general, consistent with riboPLATE-seq.

270 We used gene set enrichment analysis (GSEA) to identify gene ontologies associated with differential  
271 ribosome association under each drug treatment (Fig. 4B), based on effect size of RA change associated  
272 with each drug. Across all drugs, all ontologies with low family-wise error rate (FWER<0.001) have  
273 negative normalized enrichment scores (NES), indicating a predominately inhibitory effect of these drugs  
274 on ribosome association. All treatments downregulate genes related to translation initiation and  
275 ribosomal components, as expected for inhibition of translation-activating signaling pathways. MNK-i1  
276 treatment inhibits these ontologies despite a relatively weak effect on the TOP motif-containing genes,  
277 suggestive of mTOR-independent inhibition of translation. Surprisingly, all kinase-dependent treatments

278 exhibit stronger, more consistent downregulation(s) of these genes than 4EGi-1; as this drug targets  
279 eIF4E directly, we expected TOP genes to be included in the set of its strongly-inhibited targets.

### 280 **Attenuation of Perturbations to Ribosome Association in Drug Combinations**

281 We expected that drug combinations would elicit greater changes in RA than the individual drug  
282 treatments alone. Specifically, we expected at least additivity if not outright synergy from simultaneous  
283 inhibition of the PI3K/Akt/mTOR and MAPK/ERK pathways, and a similar but perhaps less pronounced  
284 additivity of effects from inhibiting kinases in the same pathway (i.e. mTOR and PI3K). Surprisingly, we  
285 instead found a pattern of attenuation of the strongest effects of individual drugs when combined.  
286 Figure 5 compares the drug combination-treated samples to those treated with individual drugs,  
287 revealing attenuation of the strongest single-drug effects in combination. The volcano plots in Figure 5A-  
288 C highlight the significantly downregulated targets of the three individual kinase inhibitors PP242, MNK-  
289 i1, and BKM120, defined by thresholds on the significance and magnitude of RA change (FDR<0.01 and  
290 log-fold change in RA<-0.75, respectively). As a set, these genes exhibit comparatively diminished, less  
291 significant changes in ribosome association in combination-treated samples (Figure 5D-F), though drug  
292 combinations do not result in fewer significant RA changes overall (Table 2). The scatterplots in Figure  
293 5G-I emphasize this unexpected result of combining translation inhibitors by explicitly plotting changes  
294 in effect size for significant targets of individual drugs in combined treatments. Both positive and  
295 negative effects are diminished overall in each pairwise combination, though we observed less  
296 attenuation among individual targets of PP242 and BKM120 under combination treatment with  
297 PP242+BKM120 (Additional File #1: Supplementary Table 1).

### 298 **Motif-Based Target Classification in a Translation Control Network**

299 Finally, we displayed the results of our study in network form and mapped occurrences of a known  
300 translational cis-regulatory element, the 5' TOP motif, across this network. Following the observation of

301 concordant regulation of canonical TOP genes in drug treatments impacting the mTOR signaling  
302 pathway, we first sought to expand the potential set of TOP genes within the strongly-perturbed genes  
303 in this study. We first obtained sets of canonical TOP genes and candidates containing previously  
304 uncatalogued 5'TOP tracts, a subset of which have known TOP-containing homologues in the mouse  
305 genome, from the comprehensive analysis of human transcription start sites performed by Yamashita et  
306 al<sup>25</sup>. This yielded a total set of 1,626 TOP gene candidates: within this set, 237 candidates have mouse  
307 homologues that are known TOP genes, and this subset overlaps substantially with the 83-member set  
308 of canonical TOP genes identified (54/83 mouse homologues/canonical TOP). We found these TOP  
309 candidates to behave similarly to canonical TOP genes in terms of perturbed RA. In the strip plots in  
310 Figure 6A, TOP genes and candidates within the significant targets (FDR<0.05) of each drug on the plate  
311 are color-coded, allowing comparison of their differential RA between conditions.

312 We then constructed a simple translational regulatory network from our riboPLATE-seq data and  
313 overlaid it with these canonical and novel TOP genes (Figure 6B). We considered the genes  
314 demonstrating significant reductions in RA due to treatment with PP242, MNK-i1, and BKM120 as the  
315 positive translational targets of mTOR, PI3K, and MNK1, respectively, as these drugs are specific  
316 inhibitors of these kinases. Here, we used a typical threshold for significance (FDR<0.05), but  
317 additionally required target genes to have at least 20 average normalized read counts across all samples.

318 As expected, the targets of mTOR are enriched heavily for TOP genes and candidates. Nearly all known  
319 TOP genes and candidates with mouse homology, as well as a significant majority of remaining TOP gene  
320 candidates, are targets of mTOR. The largest fraction of each set is found in either the joint targets of  
321 mTOR and PI3K or the exclusive targets of mTOR. The largest set of targets belongs to mTOR (228  
322 exclusive/386 total), followed by PI3K (57 exclusive/213 total) and then MNK1 (21 exclusive/43 total),  
323 and TOP genes and candidates comprise a larger fraction of mTOR targets than PI3K or MNK1 targets.

324 The set of targets common to all three kinases is also highly enriched for curated and novel TOP genes  
325 (Fisher's exact test  $p=0.00006$ ), suggesting a subset of TOP genes impacted by MNK1, though this three-  
326 way intersection is vastly smaller and less significantly-enriched for these genes than the two-way  
327 intersection of mTOR and PI3K targets (Fisher's exact test  $p=6 \times 10^{-24}$ ). Furthermore, the targets  
328 exclusive to either MNK1 or PI3K are not significantly enriched for TOP genes and candidates (Fisher's  
329 exact test  $p=0.760$  and  $p=0.219$ , respectively) in contrast to the exclusive targets of mTOR ( $p=5 \times 10^{-8}$ ).  
330 Supplementary Table 2 details a more comprehensive statistical analysis of the network in Figure 6B,  
331 which considers TOP genes and candidates separately, while the calculations above consider enrichment  
332 across the combined set of genes and candidates (Additional File #1: Supplementary Table 2). This  
333 combined regulatory network suggests a relatively minor effect of MNK1 on TOP gene translation, and  
334 underscores the dependence of the effect of PI3K on TOP genes on mTOR downstream.

335

## 336 **DISCUSSION**

337 Ribosome association is frequently used to infer translational activity. This can be measured by sucrose  
338 gradient fractionation of intact RNA in polysome profiling, or of digested monosomes and their  
339 ribosome-protected footprints in ribosome profiling. Translation efficiency, defined as the rate of  
340 protein production per transcript, is approximated differently in these two methods. In polysome  
341 profiling, it is calculated as the ratio of transcripts that sediment in "heavy" vs "light" fractions, similar to  
342 the ratio of ribosome association in riboPLATE-seq. Ribosome profiling refines this measurement with its  
343 focus on ribosome footprints, calculating instead a per-transcript ribosome occupancy with additional  
344 information about position, regional density, and ribosome arrest<sup>26</sup>. riboPLATE-seq sacrifices the specific  
345 positional information provided by ribosome profiling for a general measurement of ribosome  
346 association, obtained by IP rather than sucrose gradient fractionation. With pooled library construction,

347 greater throughput is possible with riboPLATE-seq than with either ribosome profiling or polysome  
348 profiling.

349

350 Though it is more scalable than ribosome profiling, riboPLATE-seq is not without limitations. The lack of  
351 resolution of individual ribosome positions means the method cannot resolve location-specific effects,  
352 such as the effect of ribosome association in 5' leader sequences on translation in downstream coding  
353 sequences<sup>7</sup>. More generally, riboPLATE-seq is insensitive to translational regulation at the levels of  
354 elongation or termination due to its inability to distinguish active from stalled ribosomes, a limitation  
355 common to many ribosome-centric measurements<sup>27</sup> including ribosome profiling.

356

357 In this study, we interrogated translational regulation in mitogenic signaling pathways in cancer cells.  
358 Focal amplification of PDGFRA in TS-543 glioma neurospheres leads to constitutive activation of several  
359 members of these pathways, including ERK, Akt, and PI3K<sup>12</sup>. We observed the expected results of mTOR  
360 inhibition on translation with riboPLATE-seq, including decreased ribosome association with TOP genes,  
361 and further clarified targets for the kinases PI3K and MNK1. We found PI3K to target a subset of the TOP  
362 genes impacted by mTOR, without a strong impact on known TOP genes or candidate transcripts  
363 separate from that shared with mTOR. This suggests the effect of PI3K on the TOP genes may be wholly  
364 mediated by mTOR, consistent with the known organization of their signaling pathway. In contrast,  
365 treatment with either the highly-specific MNK inhibitor MNK-i1 or the eIF4E inhibitor 4EGi-1 did not  
366 significantly impact the TOP genes. Despite both drugs impacting the effector through which mTOR is  
367 thought to mediate TOP gene translation, eIF4E, off-target effects of commonly-used MNK inhibitors in  
368 past studies<sup>22</sup> may have overemphasized previous observations to this effect, and potential off-target  
369 effects of 4EGi-1<sup>28</sup> complicate interpretation of its specific, eIF4E-dependent targets.

370



371 Pairwise combinations of inhibitors did not generate additive effects on ribosome association, instead  
372 triggering what we interpreted as compensatory regulation and attenuating the strongest effects of  
373 individual inhibitors. Surprisingly, combination treatment with PP242 and BKM120 attenuated their  
374 individual targets the least, despite the seeming redundancy of these drugs targeting the same pathway.  
375 Though still attenuated overall, a greater portion of the individual targets of PP242 and BKM120 were  
376 enhanced by combination treatment. This might suggest that PI3K inhibition does not saturate inhibition  
377 of its downstream effectors, including mTOR. These surprising findings highlight the utility of explicitly  
378 testing combined perturbations and the need for scalable measurement strategies like riboPLATE-seq.  
379

## 380 **CONCLUSION**

381 This study serves as a proof-of-concept for larger-scale perturbation screens of potential translational  
382 regulators. Here, riboPLATE-seq revealed signatures of specific translational targets for kinases in related  
383 signaling pathways. Our results are consistent with the known structure of these pathways, including the  
384 previously established mechanism by which mTOR controls translation of the TOP motif-containing  
385 genes. However, the majority of the ~500 known protein kinases remain unstudied at the level of  
386 translational regulation. The technology described here could enable a more comprehensive screen of  
387 protein kinases and/or RNA binding proteins, allowing inference of translational regulatory networks  
388 and *de novo* identification of regulatory motifs important to these networks that might be validated by  
389 high-resolution techniques like ribosome profiling and CLIP-seq. We anticipate that the ability to dissect  
390 these networks at scale will advance our understanding of translational regulation and the design of  
391 specific therapies for diseases involving aberrant translation.

392

## 393 **METHODS**

394 **Tissue Culture and Drug Treatment**

395 We seeded TS-543 neurospheres (passage #11) on a 96-well plate (Corning, #3799) at a density of 7,500  
396 cells per well (50,000 cells/mL) in 150uL NS-A complete medium (containing 10% v/v NeuroCult NS-A  
397 Proliferation Supplement, 20ng/mL EGF, 10ng/mL bFGF, and 2ug/mL heparin) (STEMCELL Technologies  
398 #05751). We incubated the plate of cells for 36 hours prior to the start of the experiment at 37°C and 5%  
399 CO<sub>2</sub> in a tissue culture incubator. We separately prepared stock solutions of PP242 (Tocris, #4257),  
400 MNK-i1, NVP-BKM120 (Selleck, S2247), AZD8055 (Selleck, S1555), and 4EGi-1 (Tocris, #4800) in DMSO  
401 vehicle (Sigma, #472301). After dilution with NS-A basal culture medium (without supplement,  
402 cytokines, or heparin) (STEMCELL Technologies #05751), we administered the drugs or pure DMSO to  
403 the experimental and control wells, respectively, in 1uL doses. Final concentrations were 50nM  
404 AZD8055, 625nM PP242, 1μM BKM120, 100nM MNK-i1, and 50μM 4EGi-1, including in pairwise  
405 combination-treated samples. Drug treatment proceeded for 6 hours in the tissue culture incubator  
406 prior to lysis.

407 **Cell Lysis**

408 Following treatment, we centrifuged the plate of TS-543 for 7 minutes at 1800RPM on a Sorvall Legend  
409 XTR at room temperature and removed supernatants by aspiration. Placing the plate on ice, we  
410 resuspended the pelleted cells in each well in 30uL of polysome lysis buffer (20mM Tris-HCl, pH=7.4,  
411 250mM NaCl, 15 mM MgCl<sub>2</sub>), 0.1mg/mL cycloheximide, 0.5% Triton X-100, 1mM DTT, 0.5U/mL  
412 SUPERase-In (ThermoFisher, AM2696), 0.024U/mL TURBO DNase (Life Technologies, AM2222), 1x  
413 Protease Inhibitor (Sigma, P8340)), mixed 5 times by pipetting, and rested the plate on ice for 5 minutes.  
414 We then centrifuged the plate for 5 minutes at 1400RPM at 4°C to remove bubbles before performing a  
415 quick freeze-thaw, placing the plate first in a -80°C freezer and then resting at room temperature for 5  
416 minutes each. Following an additional 10 minutes rest on ice, we viewed the plate under a microscope  
417 to check the extent of cell lysis. At this point, we added standard RNA spike-ins (ERCC Spike-In Mix #1, 1

418 uL/well of 1:5000 diluted stock) (Life Technologies, #4456740) to half of the wells for spike-in depletion  
419 experiments. We then prepared a new 96-well plate containing 3.5uL 2x TCL buffer (Qiagen, #1070498)  
420 per well, to which we transferred 3.5uL of lysate (approximately 10% total volume).

#### 421 **Automated Pan-Ribosome Immunoprecipitation**

422 To the remaining lysate, we added 1 uL of SUPERase-in (ThermoFisher, AM2696) and 1 uL of biotinylated  
423 y10b antibody (ThermoFisher, MA516060) to each well, then sealed the plate and allowed it to incubate  
424 while gently shaking for 4 hours at 4°C. During this incubation, we washed 500uL of Dynabeads MyOne  
425 Streptavidin C1 streptavidin-coated magnetic beads (ThermoFisher, #65001) 3 times with polysome  
426 wash buffer (20mM Tris-HCl (pH 7.4), 250mM NaCl, 15mM MgCl<sub>2</sub>, 1mM DTT, 0.1mg/mL cycloheximide,  
427 0.05% v/v Triton X-100), using 1mL per wash and resuspending in 500uL. We added 5uL of washed  
428 beads to each well, then incubated while gently shaking at 4°C for an additional hour. After this short  
429 incubation, we placed the plate on a magnet, removed and reserved supernatants, and washed the  
430 wells 3 times with 200uL per well of polysome wash buffer supplemented with 1uL/mL SUPERase-in on  
431 the Biomek 4000 automated liquid handling system.

432 Following the final wash, we resuspended the beads in 15uL of ribosome release buffer (20mM Tris-HCl  
433 (pH 7.4), 250mM NaCl, 0.5% Triton X-100, 50mM EDTA) per well. During a 15-minute incubation at 4C  
434 on a Peltier module, with continuous pipet mixing on the Biomek 4000 in order to maximize elution, we  
435 distributed 15uL of 2x TCL buffer to each well of a new 96-well plate. Finally, we replaced the sample  
436 plate on the magnet and transferred eluants to the TCL-containing plate.

#### 437 **PLATE-seq Library Preparation and Sequencing**

438 The plates of ribosome-associated and previously reserved total lysate in TCL buffer were submitted to  
439 the Columbia Genome Center for processing by the previously-described PLATE-seq method of RNA-seq  
440 library preparation<sup>10</sup>, which involves poly-A selection of transcripts, incorporation of sequence barcodes

441 in poly(T)-primed reverse transcription, and pooling for subsequent library preparation steps, generating  
442 a single 3'-end RNA-seq library from each 96-well plate. We pooled total and ribosome-associated  
443 PLATE-seq libraries and sequenced the combined libraries on the Illumina NextSeq 550 with a 75-cycle  
444 high-output kit. With paired-end sequencing, the first read corresponds to the 3' end of a transcript, and  
445 the second read contains the barcode identifying the library in which the read was obtained.

#### 446 **Ribosome Profiling and RNA Sequencing**

447 We seeded TS-543 neurospheres in a 6-well plate at a starting density of 50,000 cells/mL in 2 milliliters  
448 of NS-A complete medium per well, and allowed the plate to rest for 36 hours. After preparing PP242  
449 and MNK-i1 solutions in DMSO as above, we treated two wells each with 625nM PP242, 1.0 $\mu$ M MNK-i1,  
450 or DMSO vehicle for 6 hours in the tissue culture incubator. Following treatment, we transferred  
451 samples to 15mL conical vials for centrifugation at 640 RCF for 7 minutes, then removed supernatants  
452 and added 400  $\mu$ L polysome lysis buffer (recipe above). After mixing by rapid pipetting, we transferred  
453 samples to 1.8mL microcentrifuge tubes, rested them on ice for 5 minutes, and triturated by 5 passages  
454 through a 23-gauge needle. Following a clarifying spin of 11K RCF for 10 minutes at 4C on a benchtop  
455 centrifuge, we transferred supernatants to a new set of microcentrifuge tubes and discarded pellets.  
456 Finally, we prepared ligation-free ribosome profiling and total RNA-seq libraries from these clarified  
457 polysome lysates following the instructions provided with their respective kits (smarter-seq smRNA-seq  
458 kit, Takara-Clontech; NEBnext Ultra-Directional II), augmented with our previously-published ligation-  
459 free ribosome profiling protocol<sup>8</sup>. We sequenced 6 ribosome profiling libraries or up to 12 RNA-seq  
460 libraries in one NextSeq 550 high-output 75-cycle kit.

461 Both PLATE-seq and ligation-free ribosome profiling library preparation protocols are available on our  
462 laboratory website<sup>29</sup>.

#### 463 **Read Alignment and Data Analysis**

464 Using a custom pipeline, we first trim reads of trailing polyA sequence and adapters with fastx-clipper<sup>30</sup>  
465 (fastx-toolkit v0.0.14), then align the multiplexed reads to the hg19 assembly of the human genome and  
466 known RNA spike-in sequences with STAR v2.4.0. We then demultiplex the aligned reads to their original  
467 riboPLATE- or PLATE-seq libraries according to their barcodes (available in BarcodesHiSeq.txt). We use a  
468 similar pipeline to process and align ribosome profiling and RNA sequencing libraries. Additional  
469 processing steps are required for ribosome profiling in order to trim polyA tails and adapters with  
470 fastx\_trimmer<sup>30</sup>, then remove ribosomal RNA-aligned reads with bowtie2<sup>31</sup> (v2.1.0). We use  
471 featureCounts<sup>32</sup> (from Subread v1.4.6) to count the number of fragments aligned to each gene in each  
472 library, counting all exon-aligned reads as valid.

#### 473 **Definition of Gene Sets of Interest**

474 As PLATE- and riboPLATE-seq depend on isolation of RNA by poly(T) pulldown, they can only be used to  
475 measure polyadenylated transcripts. We defined a set of questionably-polyadenylated transcripts by the  
476 union of the set of non-polyadenylated and variably-polyadenylated genes identified in a screen of  
477 polyadenylation status across the transcriptome<sup>33</sup>. We removed these genes from consideration in our  
478 study to leave only consistently polyadenylated transcripts. We additionally obtained a set of known 5'  
479 terminal oligopyrimidine motif-containing genes (TOP genes), as well as novel TOP candidates with and  
480 without known TOP-containing analogues in mice, from a comprehensive search of transcription start  
481 sites<sup>25</sup>.

#### 482 **Regularized Logarithm Normalization and Outlier Removal**

483 After subsetting the count matrices for all libraries to remove counts for reads aligned to non-  
484 polyadenylated and spike-in transcripts, we constructed an overall count matrix of all 192 libraries for all  
485 96 samples. We loaded this matrix into DESeq2 with corresponding column data describing the sample  
486 ID, library type (ribo or RNA PLATE-seq), and drug treatment for each library. We then used the

487 regularized logarithm function in DESeq2 with default parameters to obtain a variance-stabilized, log-  
488 scale transformation of raw counts for all libraries.

489 We used this transformed count matrix to perform two-dimensional principal component analyses (PCA)  
490 in Python, utilizing the scikit-learn package for analysis and matplotlib for visualization. We removed a  
491 total of 15 outliers from the PCA plots of ribosome-associated RNA, total RNA, and rlog-ribosome  
492 association, which we defined as the log-difference between the two measurements (rlog(riboPLATE)-  
493 rlog(PLATE)). We then constructed a reduced matrix of raw counts corresponding to the remaining 81  
494 samples (see Table 1) and again performed rlog normalization on this matrix in DESeq2. We used this  
495 final matrix of rlog-normalized counts for non-outlier samples, as well as the raw count version of this  
496 matrix, for RNA quality control and principal component analyses in Figures 2 and 3, respectively.

#### 497 **Differential count analysis in DESeq2**

498 We performed differential expression and differential ribosome association analyses using the DESeq2  
499 package in R<sup>34</sup>. First we constructed a column data table identifying the sample ID, drug treatment, and  
500 library type (riboPLATE vs PLATE) for each library. After loading this table and the raw count matrix for  
501 non-outlier samples, we performed simultaneous analyses for all drug treatments vs DMSO-treated  
502 controls using the following design formula:

```
503 design = ~condition + condition:ind.n + condition:type
```

504 In this design formula, condition refers to drug treatment status, type refers to riboPLATE-seq or PLATE-  
505 seq library preparation, and ind.n corresponds to sample ID nested within condition, in accordance with  
506 the DESeq2 vignette<sup>35</sup> (section *Group-specific condition effects, individuals nested within groups*). Pairing  
507 of riboPLATE- and PLATE-seq libraries from the same sample in this way allows DESeq2 to correct for  
508 sample-to-sample noise while calculating group-wise effects of drug treatment.

509 After setting PLATE-seq as the reference level for library type and DMSO as the reference level for drug  
510 treatment condition, we executed the DESeq2 function using `fitType=local`, then retrieved results for  
511 each drug treatment and comparison of interest. For differential ribosome association, we used function  
512 calls of the following format:

```
513 res <- results(dds, name=paste0("typeribo.condition",cond))
```

514 Where `dds` is the `DESeqDataSet` object and `cond` is any of the drug treatments. The interaction between  
515 library type and drug treatment is equivalent to the calculation of ribosome association (RA). For  
516 differential expression, we considered only changes in gene abundance between PLATE-seq libraries  
517 independent of riboPLATE-seq. This required function calls of the following format:

```
518 res <- results(dds, name=paste0("condition",cond))
```

519 Where `dds` is the `DESeqDataSet` object and `cond` is any of the drug treatments. This isolates the main  
520 effect of drug treatment, defined across total RNA PLATE-seq libraries only.

521 For ribosome profiling and RNA sequencing, we followed a similar workflow, utilizing a design formula  
522 without sample pairing:

```
523 design = ~condition + type + condition:type
```

524 where `condition` corresponds to drug treatment (MNKi1, PP242, or DMSO) and `type` corresponds to  
525 RNA-seq vs ribosome profiling. We then set the base level of `type` to RNA and the base `condition` to  
526 DMSO, and executed DESeq2 with `fitType=local`. Finally, we retrieved results specific to the  
527 interaction effect, here equal to the calculated change in translation efficiency (TE) as a result of drug  
528 treatment, with the following two function calls:

```
529 res_242 <- results(dds, name = "typeribo.conditionPP242")
```

```
530 res_MNK <- results(dds, name = "typeribo.conditionMNKi1")
```

### 531 **Identification of Perturbed Gene Ontologies by Gene Set Enrichment Analysis**

532 We constructed ranked lists for gene set enrichment analysis (GSEA) using the results of these  
533 differential expression and ribosome association analyses. We first removed any gene with invalid  
534 results reported by DESeq2 in any drug-vs-control comparison (i.e. genes with assigned p-value 'NA')  
535 from consideration. Next, we created a ranked list of genes for each drug treatment, using each gene's  
536 log-fold change in RA as a rank statistic. We then performed a preranked GSEA on the C5 collection of  
537 gene ontology terms against these ranked lists, using the Preranked option in the GSEA-P desktop  
538 application<sup>36</sup>, with default parameters and scoring method set to 'classic'.

### 539 **Network Visualization**

540 To create a basic network, we interpreted the abundant genes exhibiting highly significant reductions in  
541 RA under treatment with kinase inhibitors (FDR<0.01, baseMean>=20) as positive targets of the kinases  
542 in question. We loaded these gene sets into CytoScape<sup>37</sup> (v2.7.1) as individual networks for each kinase,  
543 merged the three networks, and used the yFiles<sup>38</sup> Organic automatic layout to organize the resulting  
544 merged network. We then color-coded the sets of canonical and novel TOP motif-containing genes  
545 present in the network, based on the lists obtained from Yamashita et al<sup>25</sup>.

### 546 **Data Visualization and Code**

547 We generated plots and diagrams using matplotlib (v3.0.2) and Jupyter Notebook (v5.0.0)<sup>39,40</sup>. Our  
548 analyses use NumPy<sup>41</sup> (v1.13.3) for data manipulation, SciPy<sup>42</sup> (v0.14.0) for statistical tests, scikit-learn<sup>43</sup>  
549 (v0.19.1) for PCA. We additionally generated strip plots and heatmaps using Seaborn<sup>44</sup> (v0.9.0) in  
550 Python.

551

552



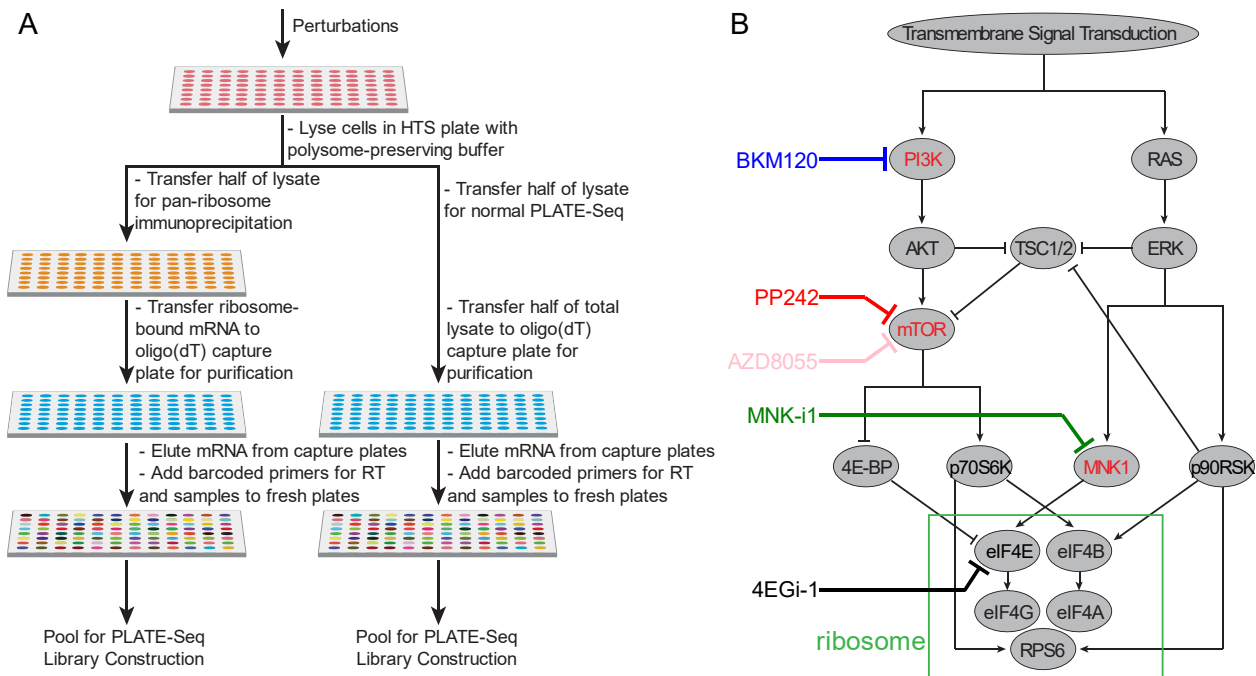

553

554 **Figure 1: Overview of the protocol and experimental design of the study performed.** A) Schematic

555 diagram of the riboPLATE-seq protocol, from lysis in a multi-well plate to pooled library preparation. The

556 right-hand side mirrors the original PLATE-seq protocol. In this workflow, an oligo-dT-grafted plate

557 captures polyadenylated RNA that can be reverse-transcribed with barcoded adapters, generating a

558 plate of cDNA that may be pooled for library construction. The left side incorporates a pan-ribosome IP

559 before PLATE-seq pooling and library preparation, generating instead a pooled library of ribosome-

560 associated RNA. B) Simplified structure of the signaling pathways under study and the specific protein

561 targets considered. The PI3K/AKT/mTOR signaling axis at left converges with the MAPK/ERK pathway at

562 right on eIF4E, early in the process of ribosome assembly (green box). The figure also outlines the

563 inhibitors used in this study and their specific targets within these pathways. NVP-BKM120 is a PI3K

564 inhibitor (blue), both AZD-8055 and PP242 are mTOR inhibitors (pink and red, respectively), MNK-i1 is a

565 MNK1 inhibitor (green), and 4EGi-1 is a direct eIF4E inhibitor (black).

566

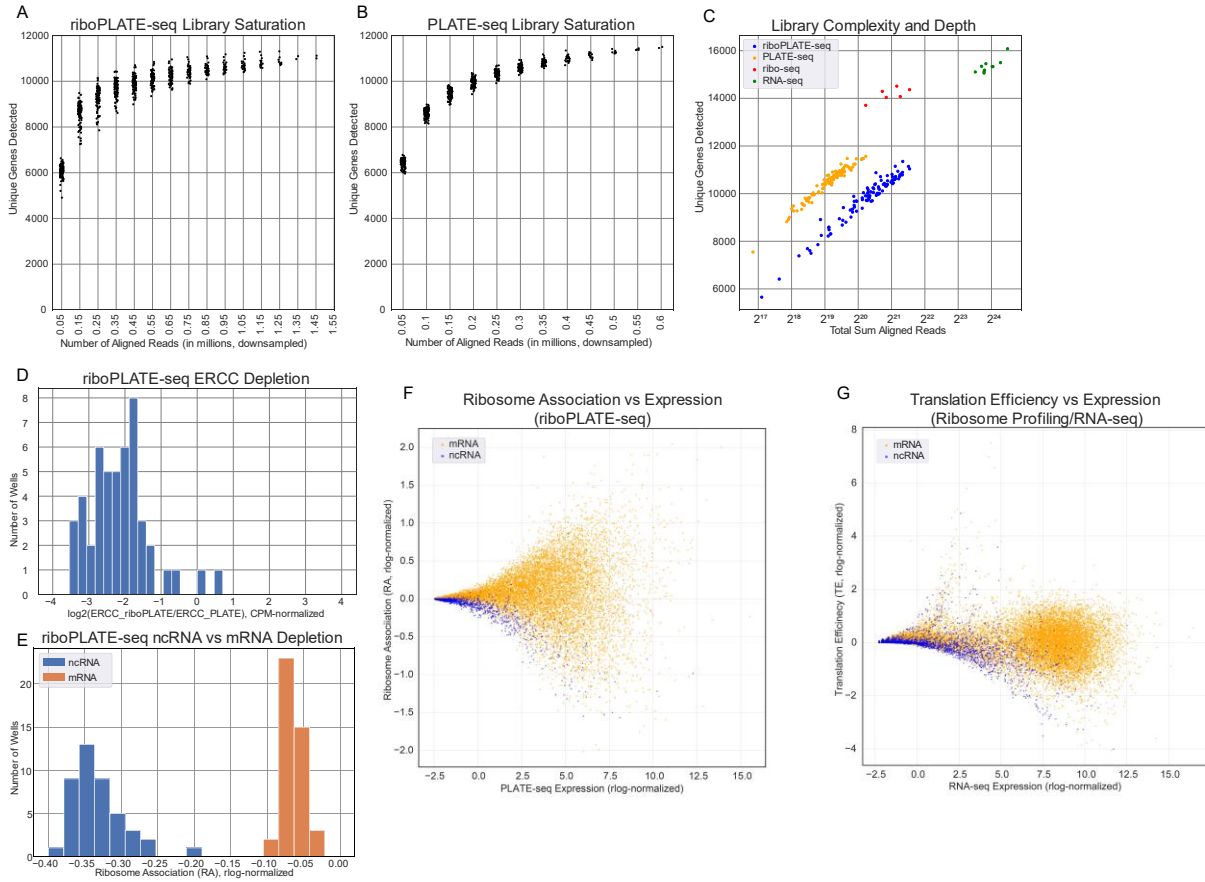

567

568 **Figure 2: RNA-seq quality control in riboPLATE-seq.** A-B) Library saturation strip plots for ribosome-  
 569 associated (riboPLATE-seq) and total RNA (PLATE-seq) libraries in this study. In each, the Y axis shows  
 570 the number of unique genes detected in each sample at each subsampled read depth on the X axis,  
 571 excluding libraries smaller than the subsampling depth. With ~10-11,000 unique genes detected,  
 572 riboPLATE-seq and PLATE-seq are comparably saturated. C) Scatter plots emphasizing the relationship  
 573 between library size and complexity across library types. The Y axis represents the number of unique  
 574 genes detected within a library; the X axis represents its size in summed gene counts. PLATE-seq and  
 575 riboPLATE-seq are very similarly distributed, with PLATE-seq generating slightly more complex, smaller  
 576 libraries than riboPLATE-seq, while ribo- and RNA-seq generate larger, more complex libraries. D)  
 577 Depletion of RNA spike-ins due to ribosome IP for 48 spike-in-containing samples. Depletion is  
 578 calculated per-sample as the  $\log_2$ -ratio of the sum of all spike-in-aligned counts in the riboPLATE-seq

579 library over the same sum in the sample's paired PLATE-seq library, using counts-per-million  
580 normalization (CPM). Most libraries show significant depletion of spike-ins after IP (median  $\log_2$  ratio -  
581 2.16; Wilcoxon signed-rank test  $p=1.97*10^{-9}$ ). E) Ribosome association (RA) of noncoding RNA (ncRNA,  
582 blue) vs mRNA (orange) across sample wells in riboPLATE-seq. RA is calculated as the ratio of rlog-  
583 normalized riboPLATE- to PLATE-seq counts for each gene in each sample well; distributions are  
584 calculated over annotated genes with more than 100 raw counts across 96 PLATE-seq libraries. ncRNA  
585 are depleted from riboPLATE- relative to PLATE-seq, with significantly lower RA than mRNA (mean RA -  
586 0.09 for mRNA vs -0.34 for ncRNA; Mann-Whitney U test  $p=7.28*10^{-16}$ ) F,G) Scatterplots of rlog-RA (F)  
587 and TE (G) as functions of transcript abundance in DMSO-treated controls, determined by PLATE-seq or  
588 total RNA-seq aligned counts. In both, points represent noncoding (blue) or messenger (orange) RNAs,  
589 with abundance on the X axis and RA or TE on the Y axis. In riboPLATE-/PLATE-seq and to a lesser extent  
590 in ribo-/RNA-seq, ncRNA exhibit lower RA and TE than comparably abundant mRNA.

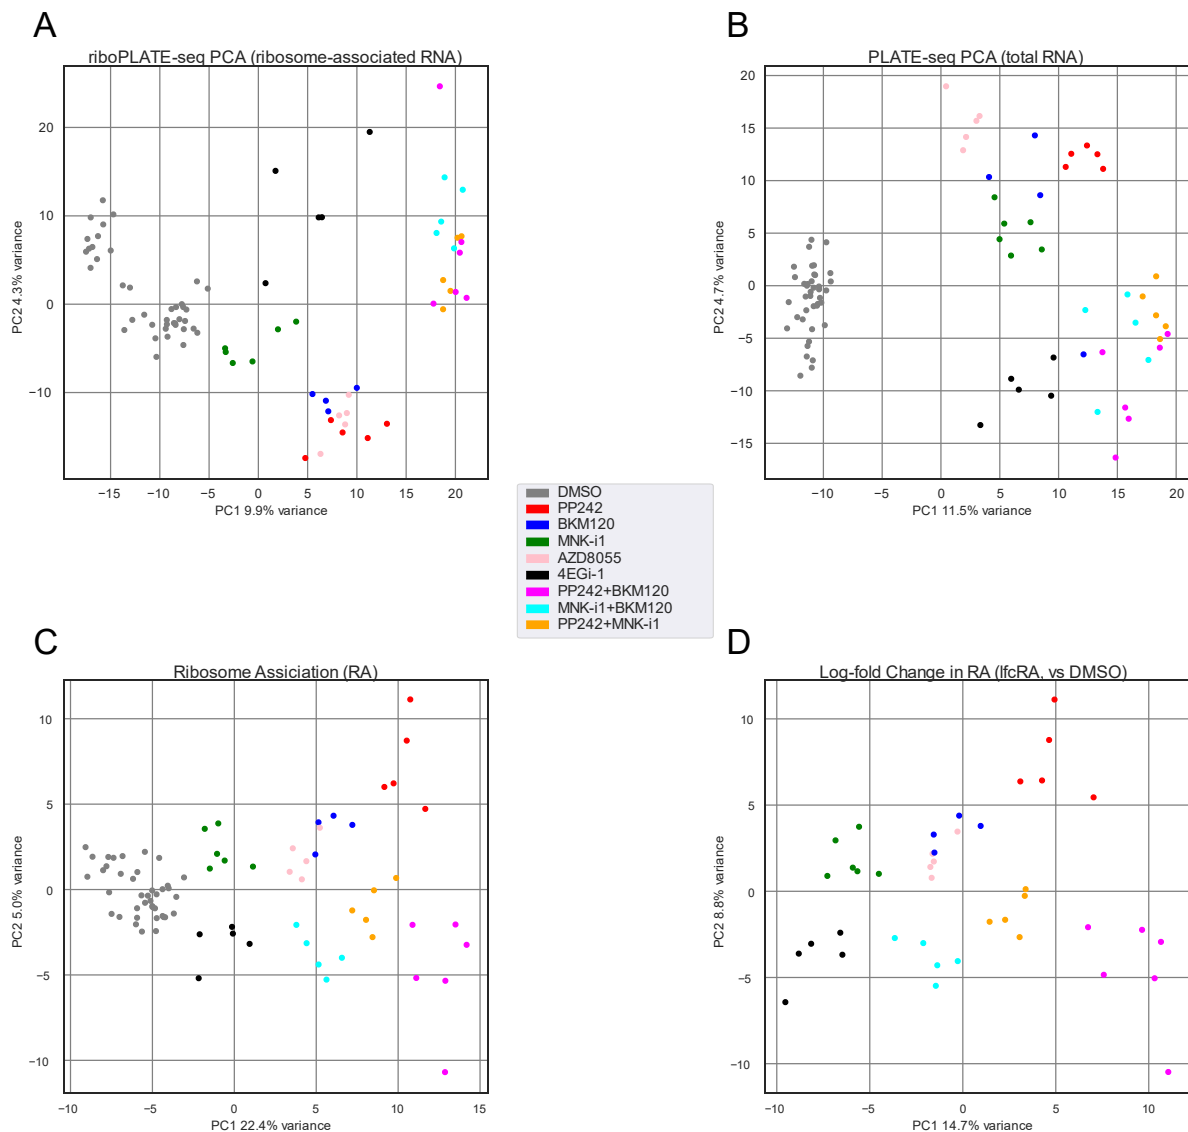

591

592 **Figure 3: Two-component Principal Component Analysis (PCA) of rlog-normalized riboPLATE-seq count**

593 **data, color-coded by drug treatment.** A) ribosome-associated RNA PLATE-seq (riboPLATE-seq), B)

594 expressed RNA/conventional PLATE-seq, C) riboPLATE-seq rlog ribosome association (RA, riboPLATE-seq-

595 PLATE-seq), D) difference in rlog-RA between each sample and the average across DMSO-treated

596 samples. For RA-dependent measurements in (C,D), the domain of the PCA was restricted to the genes

597 with significant changes in RA reported by DESeq2 for any drug treatment relative to DMSO, with an

598 additional abundance threshold (FDR<0.01, baseMean>=20; 872 genes total). Drug treatments elicit

599 changes consistent enough to yield clustering behavior among samples treated with the same drug in all  
600 four analyses, as well as co-clustering of related drug treatments (e.g. BKM120, PP242, and AZD8055).  
601 Separation is also apparent between combination treatments and their constituent, individual drugs in  
602 each plot. Additionally, in (C,D), the average PC1 coordinate value of a cluster appears correlated with  
603 the number of significant perturbations in RA detected for that cluster's drug vs DMSO, though this  
604 relationship does not extend across the horizontal line PC2=0 (Spearman rank correlation coefficients  $\rho$   
605 = 1.0,  $p=0.0$  across subgroups;  $\rho = 0.97$ ,  $p=3.3 \times 10^{-5}$  for RA and  $\rho = 0.90/p=0.002$  for lfcRA considering all  
606 samples).

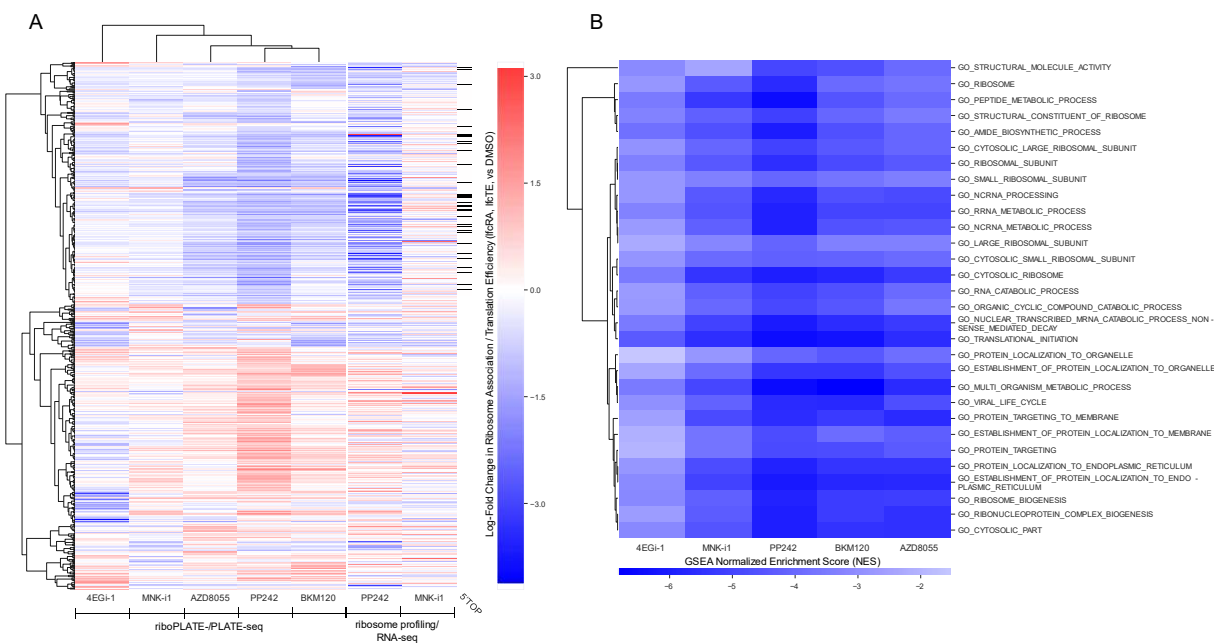

607  
608 **Figure 4: Translational signatures of drug treatments observed with riboPLATE-seq and comparison to**  
609 **ribosome profiling/RNA-seq.** A) Hierarchically-clustered heatmap of log-fold change in RA for each drug  
610 treatment vs DMSO, calculated by DESeq2. The Y axis is comprised of a restricted set of genes exhibiting  
611 significant differences in RA due to drug treatment ( $p < 0.01$ ), with greater than 20 mean normalized  
612 counts per sample (baseMean > 20, calculated by DESeq2 to account for sequencing depth), across the

613 set of drugs on the X axis. The column dendrogram demonstrates the greatest similarity in effect among  
614 the three inhibitors of the PI3K/Akt/mTOR signaling axis, with lesser correlations to MNK-i1 and 4EGI-1.  
615 At right, not included in the dendrogram, are signatures of differential translation efficiency (TE) across  
616 this same set of genes, generated via ribosome profiling and RNA sequencing of PP242-, MNK-i1-, and  
617 DMSO-treated samples. PP242 generates a strong signature with correlation across RA and TE regimes  
618 (Spearman  $\rho=0.76$ ,  $p=5.00 \times 10^{-90}$ ); by contrast, the signature for MNK-i1 treatment is weak and poorly  
619 correlated across datatypes (Spearman  $\rho=0.089$ ,  $p=0.055$ ). In the rightmost column, the canonical  
620 terminal oligopyrimidine motif-containing genes (TOP genes) present in the Y axis gene set are identified  
621 with tick marks, showing consistent downregulation of these genes in RA and TE under treatment with  
622 PI3K/Akt/mTOR axis inhibitors. B) Heatmap of GSEA normalized enrichment scores (NES) of highly  
623 significant differentially-enriched gene ontology terms from the MSigDB C5 collection (biological  
624 process, molecular function, and cellular component). The Y axis consists of a highly conservative set of  
625 gene ontology terms identified as significantly differentially enriched in RA (GSEA FWER<0.001) due to  
626 treatment with any of the drugs on the X axis. At this level of significance, all NES are negative,  
627 indicating downregulation of their associated gene ontologies. Downregulated ontologies are also  
628 largely concerned with translational machinery, the ribosome, and protein synthesis in general,  
629 reflective of the translation-inhibitory principal effects of the drugs used.

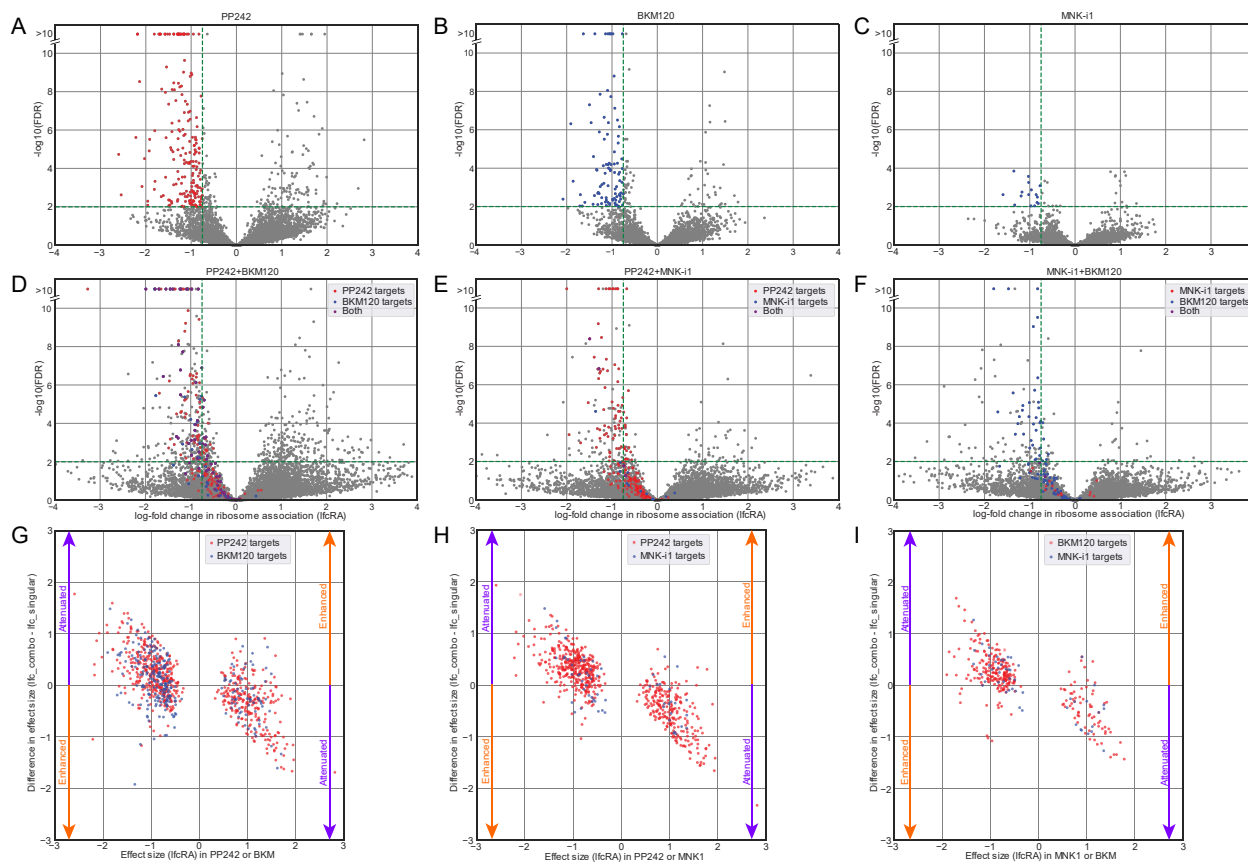

630

631 **Figure 5: Effects of drug treatments in combination.** A-C) plots of the per-gene changes in RA for PP242,  
632 BKM120, and MNK-i1 treatments vs DMSO, calculated by DESeq2. In each, the Y axis corresponds to  
633 significance and the X axis is effect size in terms of log-fold change in RA, with green dotted lines to  
634 represent the thresholds of  $p=0.01$  and  $\text{lfcRA} < -0.75$ . Genes meeting both thresholds are color-coded red  
635 or blue, and represent the major inhibitory targets of these individual drugs. D-F) Volcano plots of the  
636 three pairwise combinations of the drugs in A-C, highlighting the specific targets of the individual drugs.  
637 In each, these specific targets have largely shifted down and rightward, indicating less significant and  
638 smaller perturbation in RA of these targets in combination. G-I) Scatterplots comparing the effect under  
639 single-drug treatment and the difference between combination and single-drug effects for the same  
640 target sets from (A-C). These plots show the relationship between initial effect size under single drug  
641 treatment and the degree of attenuation or amplification in this effect under combined treatment,

642 excluding targets that change sign (Additional File #1: Supplementary Table 1 for details). The majority  
643 of targets fall in the first and third quadrants of each plot, indicating attenuation of most targets, though  
644 a greater fraction of targets in quadrants 2 and 3 for the combination of PP242+BKM120 suggests  
645 additivity in some of their effects. The plots additionally demonstrate a consistent pattern of increased  
646 attenuation (e.g. increased differences between combination and singular effect size) with increasing  
647 single-treatment effect size ( $\rho = -0.48$ ,  $p = 1.9 \cdot 10^{-32}$  for PP242+BKM120;  $\rho = -0.63$ ,  $p = 9.7 \cdot 10^{-15}$  for  
648 PP242+MNK-i1;  $\rho = -0.55$ ,  $p = 5.2 \cdot 10^{-45}$  for BKM120+MNK-i1).



A

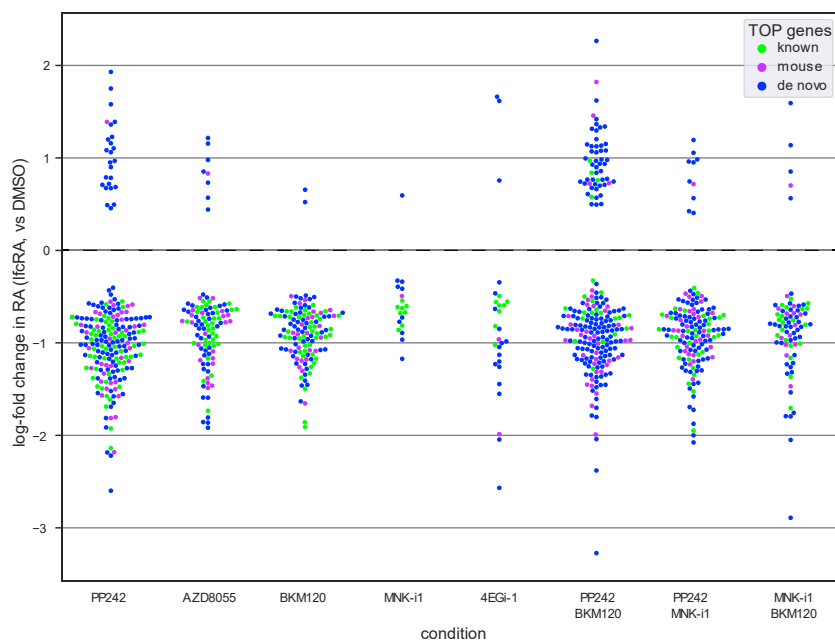

B

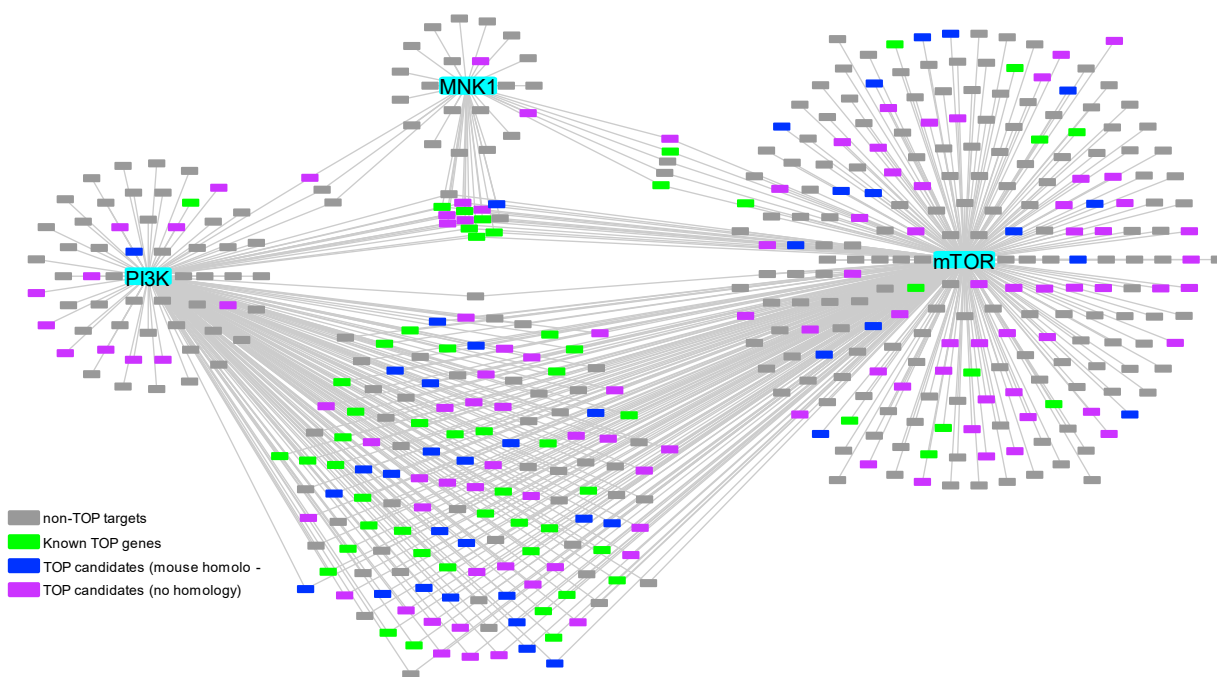

649

650 **Figure 6: Network visualization of RA perturbations and association with known regulatory motifs. A)**

651 TOP genes and candidates significantly perturbed in RA by drug treatments. Strip plots along the X axis,

652 labeled for each drug treatment in our riboPLATE-seq study, contain log-fold changes in RA (Y axis) for

653 the genes exhibiting significant RA perturbations (FDR<0.05) under each treatment relative to DMSO

654 controls, excluding non-TOP-containing genes. TOP candidates behave similarly to canonical TOP genes,  
655 exhibiting decreased RA under treatment with mTOR axis inhibitors (PP242, AZD8055, BKM120) while  
656 MNK-i1 and 4EGi-1 elicit fewer significant alterations in these sets. B) Network representation of targets  
657 of mTOR, PI3K, and MNK1, interpreted as the sufficiently-abundant genes exhibiting significant  
658 decreases in RA under treatment with PP242, BKM120, and MNK-i1, respectively (FDR<0.05, baseMean  
659 > 20). Targets are color-coded to identify them as canonical 5'TOP motif-containing genes (green), TOP  
660 gene candidates with known mouse homologues (blue) or no known homology (purple), or genes with  
661 no known TOP motif (gray). The mTOR-exclusive targets are enriched for TOP genes and candidates  
662 (Fisher's exact test  $p=4.92*10^{-8}$ ), as are the common targets of mTOR and PI3K ( $p=5.74*10^{-24}$ ) and the  
663 targets common to all three kinases (Fisher's exact test  $p=5.88*10^{-5}$ ). In contrast, MNK1 targets very few  
664 genes, and proportionally fewer of them are TOP genes or candidates (Fisher's exact test on MNK1-  
665 exclusive targets  $p=0.760$ ). Detailed analysis of TOP gene enrichment provided in Supplementary Table 2  
666 (Additional File #1: Supplementary Table 2).

667

| Drug Treatment | Total Samples | Remaining Samples (outliers removed) |
|----------------|---------------|--------------------------------------|
| AZD8055        | 6             | 5                                    |
| BKM120         | 6             | 4                                    |
| DMSO           | 48            | 40                                   |
| MNK-i1         | 6             | 6                                    |
| 4EGi-1         | 6             | 5                                    |
| PP242          | 6             | 5                                    |
| MNK-i1+BKM120  | 6             | 5                                    |
| PP242+MNK-i1   | 6             | 5                                    |

|               |   |   |
|---------------|---|---|
| PP242+BKM-120 | 6 | 6 |
|---------------|---|---|

668 **Table 1: Experimental group sizes and outlier removal.** The left column describes the total number of  
 669 samples of each drug treatment condition on the plate, while the right column describes the number of  
 670 samples remaining after trimming PCA outliers.

671

| <b>Drug (riboPLATE-seq)</b> | <b>lfcRA&lt;0</b> | <b>lfcRA&gt;0</b> |
|-----------------------------|-------------------|-------------------|
| PP242                       | 400               | 320               |
| BKM120                      | 216               | 88                |
| AZD8055                     | 155               | 61                |
| MNK-i1                      | 45                | 29                |
| 4EGi-1                      | 107               | 30                |
| PP242+BKM120                | 524               | 604               |
| PP242+MNK-i1                | 313               | 174               |
| MNK-i1+BKM120               | 244               | 110               |
| <b>(ribo-seq/RNA-seq)</b>   |                   |                   |
|                             | <b>lfcTE&lt;0</b> | <b>lfcTE&gt;0</b> |
| PP242                       | 1560              | 1481              |
| MNK-i1                      | 1254              | 1109              |

672 **Table 2: Significant perturbations (FDR<0.05) in ribosome association (RA) and translation efficiency**  
 673 **(TE) as a function of drug treatment, calculated with DESeq2, separated by direction of effect.** The first  
 674 eight rows pertain to riboPLATE-seq data and calculated changes in RA, while the last two relate to  
 675 ribosome profiling/RNA-sequencing and calculated changes in TE. The first column represents the

676 number of genes exhibiting significant decreases in RA/TE (log-fold change in RA/TE < 0), while the  
677 second column represents increases in RA/TE (lfcRA/lfcTE > 0).

678

#### 679 **ADDITIONAL FILES**

680 Additional File #1: Supplementary Tables 1 and 2, Supplementary Figure 1.

681 Supplementary\_Information.docx (268KB)

682

#### 683 **DECLARATIONS**

##### 684 **Ethics approval and consent to participate**

685 Not applicable

##### 686 **Consent for publication**

687 Not applicable

##### 688 **Availability of data and materials**

689 Sequencing data for this project is available on the Gene Expression Omnibus (GEO), under  
690 accession ID GSE139238 [<https://www.ncbi.nlm.nih.gov/geo/query/acc.cgi?acc=GSE139238>]. The  
691 jupyter notebook containing all of the analyses performed for this paper and the accompanying files  
692 necessary for its functions are available for download from our laboratory website<sup>29</sup>.

##### 693 **Competing interests**

694 The authors declare that they have no competing interests.

##### 695 **Funding**

696 PAS was funded by NIH/NCI R33CA202827.

#### 697 **Authors' Contributions**

698 PAS and NJH initially proposed the riboPLATE-seq protocol, and NJH performed exploratory and  
699 foundational work in its development. JBM and JW developed the workflow for automated ribosome  
700 immunoprecipitation. JBM executed the riboPLATE-seq drug screen with SDS, and performed all  
701 computational and statistical analyses. SDS prepared all ribosome profiling and RNA-sequencing libraries  
702 in this study in addition to growing, treating, and lysing cells for the riboPLATE-seq experiment. JBM and  
703 PAS wrote the paper. All authors read and approved the final manuscript prior to submission.

#### 704 **Acknowledgements**

705 We would like to thank Charles Karan and Ronald Realubit at the High-Throughput Screening  
706 Facility of the JP Sulzberger Columbia Genome Center for their help in executing PLATE-seq library  
707 preparations. We thank MRC Technology for sharing the MNK-I1 compound.

#### 708 **REFERENCES**

- 709 1. Zoncu, R., Efeyan, A. & Sabatini, D. M. mTOR: from growth signal integration to cancer, diabetes and  
710 ageing. *Nat. Rev. Mol. Cell Biol.* **12**, 21–35 (2011).
- 711 2. Thoreen, C. C. *et al.* A unifying model for mTORC1-mediated regulation of mRNA translation. *Nature*  
712 **485**, 109–113 (2012).
- 713 3. Johannes, G., Carter, M. S., Eisen, M. B., Brown, P. O. & Sarnow, P. Identification of eukaryotic  
714 mRNAs that are translated at reduced cap binding complex eIF4F concentrations using a cDNA  
715 microarray. *Proc. Natl. Acad. Sci.* **96**, 13118–13123 (1999).
- 716 4. Steitz, J. A. Polypeptide Chain Initiation: Nucleotide Sequences of the Three Ribosomal Binding Sites  
717 in Bacteriophage R17 RNA. *Nature* **224**, 957–964 (1969).

- 718 5. Ingolia, N. T., Ghaemmaghami, S., Newman, J. R. S. & Weissman, J. S. Genome-Wide Analysis in Vivo  
719 of Translation with Nucleotide Resolution Using Ribosome Profiling. *Science* **324**, 218–223 (2009).
- 720 6. Sanz, E. *et al.* Cell-type-specific isolation of ribosome-associated mRNA from complex tissues. *Proc.*  
721 *Natl. Acad. Sci.* **106**, 13939–13944 (2009).
- 722 7. Gonzalez, C. *et al.* Ribosome Profiling Reveals a Cell-Type-Specific Translational Landscape in Brain  
723 Tumors. *J. Neurosci.* **34**, 10924–10936 (2014).
- 724 8. Hornstein, N. *et al.* Ligation-free ribosome profiling of cell type-specific translation in the brain.  
725 *Genome Biol.* **17**, 149 (2016).
- 726 9. Shigeoka, T. *et al.* Dynamic Axonal Translation in Developing and Mature Visual Circuits. *Cell* **166**,  
727 181–192 (2016).
- 728 10. Bush, E. C. *et al.* PLATE-Seq for genome-wide regulatory network analysis of high-throughput  
729 screens. *Nat. Commun.* **8**, 105 (2017).
- 730 11. Heiman, M., Kulicke, R., Fenster, R. J., Greengard, P. & Heintz, N. Cell type-specific mRNA  
731 purification by translating ribosome affinity purification (TRAP). *Nat. Protoc.* **9**, 1282–1291 (2014).
- 732 12. Szerlip, N. J. *et al.* Intratumoral heterogeneity of receptor tyrosine kinases EGFR and PDGFRA  
733 amplification in glioblastoma defines subpopulations with distinct growth factor response. *Proc.*  
734 *Natl. Acad. Sci. U. S. A.* **109**, 3041–3046 (2012).
- 735 13. Waskiewicz, A. J. Mitogen-activated protein kinases activate the serine/threonine kinases Mnk1 and  
736 Mnk2. *EMBO J.* **16**, 1909–1920 (1997).
- 737 14. Feldman, M. E. *et al.* Active-Site Inhibitors of mTOR Target Rapamycin-Resistant Outputs of mTORC1  
738 and mTORC2. *PLoS Biol.* **7**, (2009).
- 739 15. Pike, K. G. *et al.* Optimization of potent and selective dual mTORC1 and mTORC2 inhibitors: The  
740 discovery of AZD8055 and AZD2014. *Bioorg. Med. Chem. Lett.* **23**, 1212–1216 (2013).

- 741 16. Koul, D. *et al.* Antitumor Activity of NVP-BKM120--A Selective Pan Class I PI3 Kinase Inhibitor  
742 Showed Differential Forms of Cell Death Based on p53 Status of Glioma Cells. *Clin. Cancer Res.* **18**,  
743 184–195 (2012).
- 744 17. Genheden, M. *et al.* BDNF stimulation of protein synthesis in cortical neurons requires the MAP  
745 kinase-interacting kinase MNK1. *J. Neurosci. Off. J. Soc. Neurosci.* **35**, 972–984 (2015).
- 746 18. Wang, W. *et al.* 4EGI-1 induces apoptosis and enhances radiotherapy sensitivity in nasopharyngeal  
747 carcinoma cells via DR5 induction on 4E-BP1 dephosphorylation. *Oncotarget* **7**, 21728–21741  
748 (2016).
- 749 19. Grzmil, M. *et al.* MAP Kinase-Interacting Kinase 1 Regulates SMAD2-Dependent TGF- Signaling  
750 Pathway in Human Glioblastoma. *Cancer Res.* **71**, 2392–2402 (2011).
- 751 20. Shi, Y. *et al.* MNK1-Induced eIF-4E Phosphorylation in Myeloma Cells: A Pathway Mediating IL-6-  
752 Induced Expansion and Expression of Genes Involved in Metabolic and Proteotoxic Responses. *PLoS*  
753 *ONE* **9**, e94011 (2014).
- 754 21. Bain, J. *et al.* The selectivity of protein kinase inhibitors: a further update. *Biochem. J.* **408**, 297–315  
755 (2007).
- 756 22. Beggs, J. E. *et al.* The MAP kinase-interacting kinases regulate cell migration, vimentin expression  
757 and eIF4E/CYFIP1 binding. *Biochem. J.* **467**, 63–76 (2015).
- 758 23. Algire, M. A., Maag, D. & Lorsch, J. R. Pi Release from eIF2, Not GTP Hydrolysis, Is the Step  
759 Controlled by Start-Site Selection during Eukaryotic Translation Initiation. *Mol. Cell* **20**, 251–262  
760 (2005).
- 761 24. Guttman, M., Russell, P., Ingolia, N. T., Weissman, J. S. & Lander, E. S. Ribosome Profiling Provides  
762 Evidence that Large Noncoding RNAs Do Not Encode Proteins. *Cell* **154**, 240–251 (2013).
- 763 25. Yamashita, R. *et al.* Comprehensive detection of human terminal oligo-pyrimidine (TOP) genes and  
764 analysis of their characteristics. *Nucleic Acids Res.* **36**, 3707–3715 (2008).

- 765 26. Woolstenhulme, C. J., Guydosh, N. R., Green, R. & Buskirk, A. R. High-Precision Analysis of  
766 Translational Pausing by Ribosome Profiling in Bacteria Lacking EFP. *Cell Rep.* **11**, 13–21 (2015).
- 767 27. Arava, Y. *et al.* Genome-wide analysis of mRNA translation profiles in *Saccharomyces cerevisiae*.  
768 *Proc. Natl. Acad. Sci.* **100**, 3889–3894 (2003).
- 769 28. Fan, S., Li, Y., Yue, P., Khuri, F. R. & Sun, S.-Y. The eIF4E/eIF4G Interaction Inhibitor 4EGI-1 Augments  
770 TRAIL-Mediated Apoptosis through c-FLIP Down-regulation and DR5 Induction Independent of  
771 Inhibition of Cap-Dependent Protein Translation. *Neoplasia* **12**, 346-IN7 (2010).
- 772 29. Sims Laboratory at Columbia University.  
773 <http://www.columbia.edu/~pas2182/index.php/technology.html>.
- 774 30. Gordon, A. & Hannon, G. FASTX-Toolkit. [http://hannonlab.cshl.edu/fastx\\_toolkit/index.html](http://hannonlab.cshl.edu/fastx_toolkit/index.html).
- 775 31. Langmead, B. Aligning short sequencing reads with Bowtie. *Curr. Protoc. Bioinforma.* **32**, 11.7. 1-  
776 11.7. 14 (2010).
- 777 32. Liao, Y., Smyth, G. K. & Shi, W. featureCounts: an efficient general purpose program for assigning  
778 sequence reads to genomic features. *Bioinformatics* **30**, 923–930 (2013).
- 779 33. Yang, L., Duff, M. O., Graveley, B. R., Carmichael, G. G. & Chen, L.-L. Genomewide characterization of  
780 non-polyadenylated RNAs. *Genome Biol.* **12**, R16 (2011).
- 781 34. Love, M. I., Huber, W. & Anders, S. Moderated estimation of fold change and dispersion for RNA-seq  
782 data with DESeq2. *Genome Biol.* **15**, 550 (2014).
- 783 35. Analyzing RNA-seq data with DESeq2.  
784 <http://bioconductor.org/packages/devel/bioc/vignettes/DESeq2/inst/doc/DESeq2.html>.
- 785 36. Subramanian, A., Kuehn, H., Gould, J., Tamayo, P. & Mesirov, J. P. GSEA-P: a desktop application for  
786 Gene Set Enrichment Analysis. *Bioinformatics* **23**, 3251–3253 (2007).
- 787 37. Shannon, P. Cytoscape: A Software Environment for Integrated Models of Biomolecular Interaction  
788 Networks. *Genome Res.* **13**, 2498–2504 (2003).



- 789 38. Wiesel, R., Eiglsperger, M. & Kaufmann, M. yFiles - Visualization and Automatic Layout of Graphs.  
790 19.
- 791 39. Hunter, J. D. Matplotlib: A 2D graphics environment. *Comput. Sci. Eng.* **9**, 90 (2007).
- 792 40. Thomas, K. *et al.* Jupyter Notebooks -- a publishing format for reproducible computational  
793 workflows. *Stand Alone* 87–90 (2016) doi:10.3233/978-1-61499-649-1-87.
- 794 41. van der Walt, S., Colbert, S. C. & Varoquaux, G. The NumPy Array: A Structure for Efficient Numerical  
795 Computation. *Comput. Sci. Eng.* **13**, 22–30 (2011).
- 796 42. Jones, E., Oliphant, T., Peterson, P. & others. SciPy.org — SciPy.org. *SciPy: Open Source Scientific*  
797 *Tools for Python* <https://www.scipy.org/> (2001).
- 798 43. Pedregosa, F. *et al.* Scikit-learn: Machine Learning in Python. *Mach. Learn. PYTHON* **6**.
- 799 44. Michael Waskom *et al.* *mwaskom/seaborn: v0.9.0 (July 2018)*. (Zenodo, 2018).  
800 doi:10.5281/zenodo.1313201.  
801
